# Supplementary material for: Contraceptive counselling in 3 Canadian bariatric surgery clinics: a multicentre qualitative study of the experiences of patients and health care providers
Source: PubMed Central journal article supplement — CMAJ Open. 2022 Mar 22;10(1):E255–61. doi: 10.9778/cmajo.20200304 (PMC8946645; doi:10.9778/cmajo.20200304), 2022-03-22
Supplement: 2020-0304-2-at.pdf [file 2020-0304-2-at.pdf]

## Appendix 2: Interview Guide (Providers)

### Welcome

Thank you for agreeing to participate in this interview. We appreciate you taking the time to help us. Thank you for agreeing to participate in this study. We are asking Canadian Bariatric care providers about their experiences counselling women about contraception.

We are hoping to use the data to build tools and strategies that could make the experience of women and their providers better.

The recording will begin when I start asking questions and we want to keep all personal identifying information, such as names, out of the recording.

We will begin with some demographic questions and then move on to more general questions.

Do you have any questions?

I will now begin recording

(Provide options if participant is unsure of answer)

For Section B the lettered options will serve as prompts, to be used based on participants previous answers

### Section A: Demographics

1. In what area of the country do you practice?
  - a. Atlantic (NFLD, NB, NS, PEI)
  - b. Central (QUE, ON, MAN)
  - c. Western (BC, ALB, SASK)
2. What is your role in the bariatric surgery clinic?
  - a. Bariatric Surgeon
  - b. Physician (non-surgical role)
  - c. Nurse
  - d. Dietitian
  - e. Counsellor/SW
  - f. Other \_\_\_\_\_
3. What is the primary type of surgery performed by your clinic?
  - a. Sleeve gastrectomy
  - b. Roux-en-Y gastric bypass
  - c. Biliopancreatic diversion with duodenal switch
  - d. Gastric banding

Provider Interview Guide

Version 1: Feb 5 2018

H17-02862

Page 1 of 2

Appendix 2, as supplied by the authors. Appendix to: Dineley B, Munro S, Norman WV, et al. Contraceptive counselling in 3 Canadian bariatric surgery clinics: a multicentre qualitative study of the experiences of patients and health care providers. *CMAJ Open* 2022. DOI:10.9778/cmajo.20200304. Copyright © 2022 The Author(s) or their employer(s). To receive this resource in an accessible format, please contact us at [cmajgroup@cmaj.ca](mailto:cmajgroup@cmaj.ca).

- e. I'm not sure
  - f. Other (please specify) \_\_\_\_\_
4. Do you agree with this statement: Oral contraceptive pills (birth control pills) are safe and effective following gastric bypass (Roux-en-Y) surgery?
- a. Yes
  - b. No
  - c. Not sure

### **Section B: Contraception Counselling**

1. Do you think that unintended pregnancy is an issue in the post-operative period? Why or why not?
2. Describe to me how you see an individual's future desire to conceive playing a role in their decision to proceed with bariatric surgery
3. Describe to me how you address contraceptive counselling in the pre-operative period
  - a. Do you routinely counsel women who are of reproductive age about the need to delay pregnancy for 12-18 months following bariatric surgery?
  - b. If not, are you aware that someone else in the clinic does this?
  - c. Describe to me how comfortable you are with this counselling? What makes it easy or difficult?
  - d. Are there barriers to completing this care that you have experienced?
  - e. Is there a resource or tool that you use to complete this counselling?
  - f. At what point in the preoperative period is contraceptive counselling undertaken?
  - g. How did you learn how to counsel about contraception?
4. Ideally, how would you have contraceptive counselling included in your clinic?
5. Before we finish, are there any other issues you think are important that we did not discuss today?

This is the end of the interview. Thank you for participating.

Provider Interview Guide

Version 1: Feb 5 2018

H17-02862

Page 2 of 2

Appendix 2, as supplied by the authors. Appendix to: Dineley B, Munro S, Norman WV, et al. Contraceptive counselling in 3 Canadian bariatric surgery clinics: a multicentre qualitative study of the experiences of patients and health care providers. *CMAJ Open* 2022. DOI:10.9778/cmajo.20200304. Copyright © 2022 The Author(s) or their employer(s). To receive this resource in an accessible format, please contact us at [cmajgroup@cmaj.ca](mailto:cmajgroup@cmaj.ca).
