# Supplementary material for: Contraceptive counselling in 3 Canadian bariatric surgery clinics: a multicentre qualitative study of the experiences of patients and health care providers
Source: PubMed Central journal article supplement — CMAJ Open. 2022 Mar 22;10(1):E255–61. doi: 10.9778/cmajo.20200304 (PMC8946645; doi:10.9778/cmajo.20200304), 2022-03-22
Supplement: 2020-0304-3-at.pdf [file 2020-0304-3-at.pdf]

## Appendix 3: Codebook

### Codes

| Name                              | Description                                                                                    | Files | References |
|-----------------------------------|------------------------------------------------------------------------------------------------|-------|------------|
| Different experiences             |                                                                                                | 5     | 6          |
| Getting & Giving Information      |                                                                                                | 24    | 49         |
| Experiences of friends and family |                                                                                                | 7     | 9          |
| Making Assumptions                |                                                                                                | 21    | 36         |
| Making it Better                  |                                                                                                | 26    | 126        |
| Missing Information               |                                                                                                | 27    | 105        |
| Changing Body                     |                                                                                                | 10    | 18         |
| Choosing my Contraception Method  |                                                                                                | 14    | 19         |
| Fertility and Choosing Surgery    |                                                                                                | 18    | 36         |
| Valuable Quotations               | Quotations that summarize an experience well, identify needs and/or suggest valuable solutions | 15    | 25         |
| What I know                       |                                                                                                | 17    | 23         |
| Misinformation                    |                                                                                                | 8     | 12         |

Jan 28, 2022

Appendix 3, as supplied by the authors. Appendix to: Dineley B, Munro S, Norman WV, et al. Contraceptive counselling in 3 Canadian bariatric surgery clinics: a multicentre qualitative study of the experiences of patients and health care providers. *CMAJ Open* 2022. DOI:10.9778/cmajo.20200304. Copyright © 2022 The Author(s) or their employer(s). To receive this resource in an accessible format, please contact us at [cmajgroup@cmaj.ca](mailto:cmajgroup@cmaj.ca).
